# Supplementary material for: Teucrium polium (L.): Phytochemical Screening and Biological Activities at Different Phenological Stages
Source: MDPI journal article supplement (doi:10.3390/molecules27051561), 2022-02-25

# *Teucrium polium* (L.): Phytochemical Screening and Biological Activities at Different Phenological Stages

Majid Sharifi-Rad<sup>1\*</sup>, Pawel Pohl<sup>2\*</sup>, Francesco Epifano<sup>3</sup>, Gokhan Zengin<sup>4</sup>, Nidal Jaradat<sup>5</sup> and Mohammed Messaoudi<sup>6,7</sup>

<sup>1</sup> Department of Range and Watershed Management, Faculty of Water and Soil, University of Zabol, Zabol 98613-35856, Iran; [Majidsharifirad@uoz.ac.ir](mailto:Majidsharifirad@uoz.ac.ir) (M.S.-R.)

<sup>2</sup> Department of Analytical Chemistry and Chemical Metallurgy, Faculty of Chemistry, University of Science and Technology, Wyspianskiego 27, 50-370 Wrocław, Poland; [pawel.pohl@pwr.edu.pl](mailto:pawel.pohl@pwr.edu.pl) (P.P.)

<sup>3</sup> Dipartimento di Farmacia, Università “Gabriele d’Annunzio” Chieti-Pescara, Via dei Vestini 31, 66100 Chieti Scalo (CH), Italy; [fepifano@unich.it](mailto:fepifano@unich.it) (F.E.)

<sup>4</sup> Physiology and Biochemistry Research Laboratory, Department of Biology, Science Faculty, Selcuk University, Konya 42130, Turkey; [gokhanzengin@selcuk.edu.tr](mailto:gokhanzengin@selcuk.edu.tr) (G.Z.)

<sup>5</sup> Department of Pharmacy, Faculty of Medicine and Health Sciences, An-Najah National University, Nablus, P.O. Box. 7, Palestine; [nidaljaradat@najah.edu](mailto:nidaljaradat@najah.edu) (N.J.)

<sup>6</sup> Nuclear Research Centre of Birine, P.O. Box 180, Ain Oussera, Djelfa 17200, Algeria; [messaoudi2006@yahoo.fr](mailto:messaoudi2006@yahoo.fr) (M.M.)

<sup>7</sup> Chemistry Department, University of Hamma Lakhdar El-Oued, B.P.789, El-Oued 39000, Algeria.

\* Correspondence: [Majidsharifirad@uoz.ac.ir](mailto:Majidsharifirad@uoz.ac.ir) (M.S.-R.); Tel.: +98-5432240568 (M.S.-R.); [pawel.pohl@pwr.edu.pl](mailto:pawel.pohl@pwr.edu.pl) (P.P.)

**Figure S1.** The exemplary GC MS chromatogram of the prepared extracts (the labels given for the chromatographic peaks correspond to those given in Table 1).

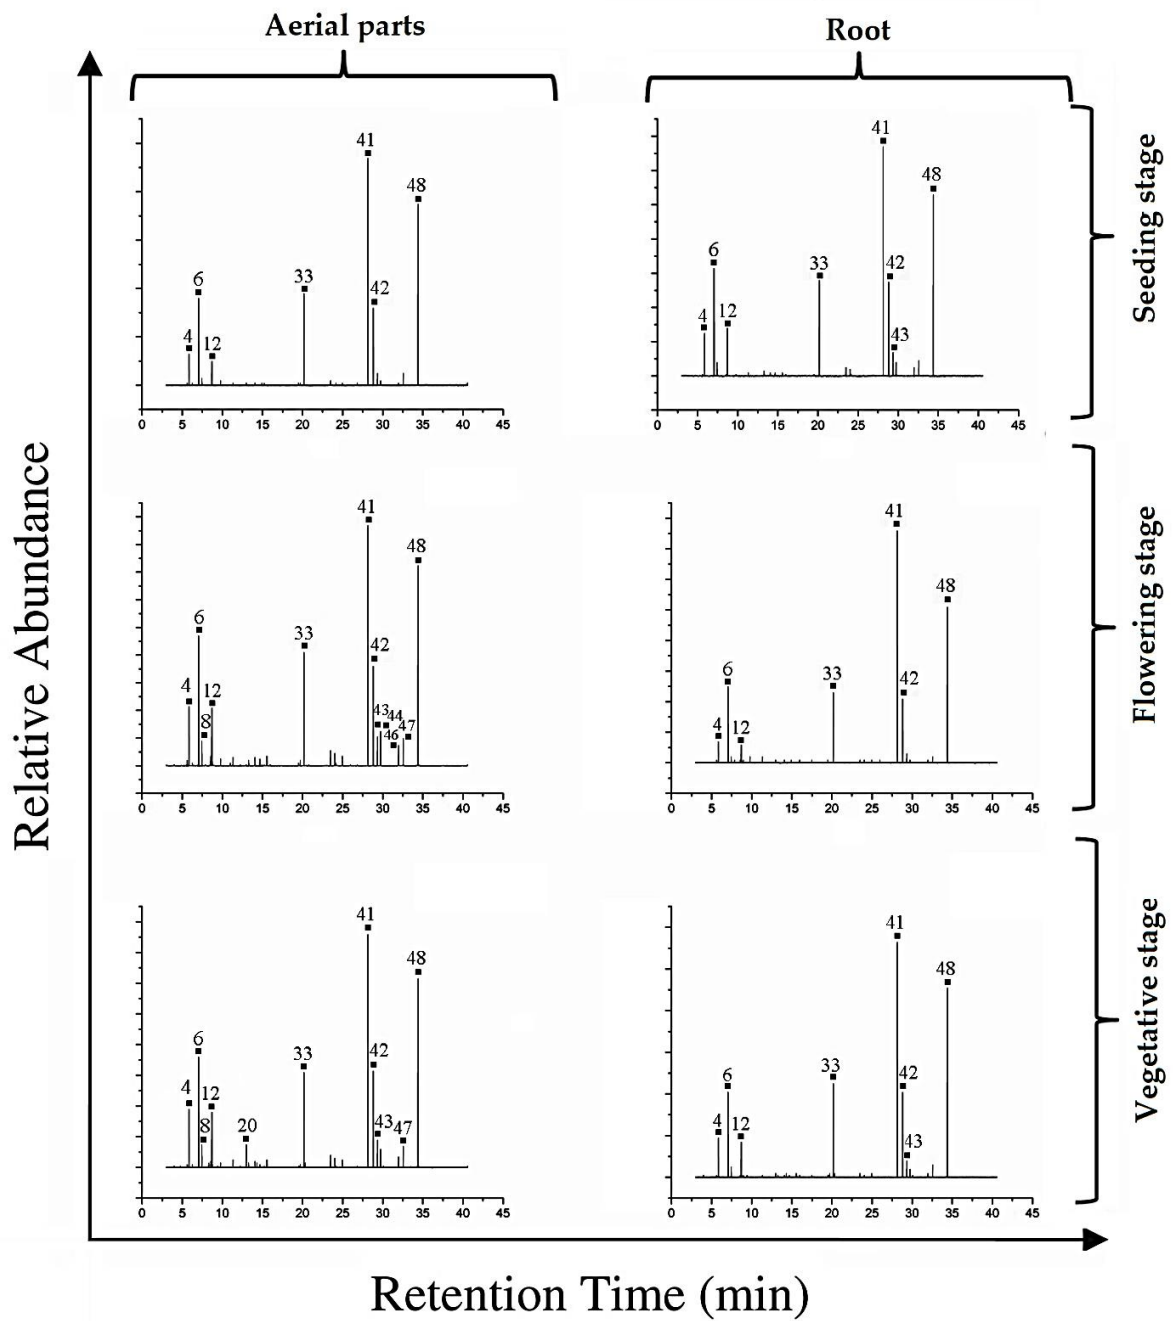

Supplement: s1 [file s1]
